# Supplementary material for: Growth and Yield of Maize in Eucalyptus Tree Alley Cropping Agroforestry Practice in Kafa Zone, Ethiopia
Source: Research Square preprint supplement (doi:10.21203/rs.3.rs-7251027/v1), 2025-08-11
Supplement: Supplementary file 1 [file 0b026161edb844b9bdd2ff96.xlsx]

## Sheet: Sheet2
Treatments	Replication	year	Maize Height(m)	Biomass weight(t/ha)	100 seed weight(g)	grain yield (t/ha)	Tree Height(m)	Diameter(cm)	Basal area(m2/ha)
Sole maize	1	1	2.41	48.3333	40	4.2
E.citrodora vs maize	1	1	2.58	50	40.8	3.55	3.05	2.38	148.218
E.camandulensis vs maize	1	1	2.52	54	39	4.96	2.9	2.05	109.965
E.grands vs maize	1	1	2.24	41.3333	40.7	3.98	4.04	2.89	218.547
E.saligna vs maize	1	1	2.64	40	40.6	2.9	4.81	3.33	290.16
Sole maize	2	1	2.23	52.6667	41.3	3			0
E.citrodora vs maize	2	1	2.16	39.3333	37.8	2.2	3.61	2.83	209.566
E.camandulensis vs maize	2	1	2.45	54.6667	40.7	6.3	3.29	2.46	158.35
E.grands vs maize	2	1	2.38	48	42	5.25	4.32	3.08	248.227
E.saligna vs maize	2	1	2.03	29.3333	36.5	2.1	4.91	3.73	364.054
Sole maize	3	1	1.91	34	39	7.55			0
E.citrodora vs maize	3	1	2.25	45.3333	42.2	4.1	3.38	2.51	164.853
E.camandulensis vs maize	3	1	2.24	52	38.5	3.96	2.8	2.1	115.395
E.grands vs maize	3	1	1.98	36	40.3	2.6	5.23	3.99	416.576
E.saligna vs maize	3	1	2.25	44.6667	39.9	4.08	4.5	3.5	320.542
Sole maize	1	2	2.59	63.6863	43.7	3.52667			0
E.citrodora vs maize	1	2	2.96	68.1818	52.4	3.97667	6.79	6.98	1274.85
E.camandulensis vs maize	1	2	2.99	74.925	48	4.2	7.03	6.58	1132.92
E.grands vs maize	1	2	2.75	62.937	50.3	2.84267	9.01	8.32	1811.32
E.saligna vs maize	1	2	2.65	44.955	44.8	1.93867	11	9.03	2133.65
Sole maize	2	2	2.48	53.946	48.5	4.37667			0
E.citrodora vs maize	2	2	2.41	40.4595	49.9	2.1	7.92	7.2	1356.48
E.camandulensis vs maize	2	2	2.69	56.5684	46	3.76667	8.12	7.81	1596.06
E.grands vs maize	2	2	2.49	41.958	43.4	2.51267	10	8.5	1890.54
E.saligna vs maize	2	2	2.21	26.2238	39.1	1.65367	11.1	8.98	2110.09
Sole maize	3	2	2.98	64.4355	50.2	5.09667	7		0
E.citrodora vs maize	3	2	2.77	47.952	51.4	3.28133	7.67	7.13	1330.23
E.camandulensis vs maize	3	2	2.75	59.94	49.5	4.23667	6.98	6.99	1278.51
E.grands vs maize	3	2	2.8	57.6923	43.5	2.32133	10.4	8.7	1980.55
E.saligna vs maize	3	2	2.4	35.964	44.9	2.08133	9.46	8.31	1806.97
Sole maize	1	3	2.11	47.6667	35.9	3.9			0
E.citrodora vs maize	1	3	2.44	48.3333	38.7	3.35	3.05	2.38	148.218
E.camandulensis vs maize	1	3	2.33	51.6667	36.4	4.375	2.9	2.05	109.965
E.grands vs maize	1	3	2.2	37.3333	38.4	3.03	4.04	2.89	218.547
E.saligna vs maize	1	3	2.52	36.6667	38.9	1.35	13.778	13.778	4967.3
Sole maize	2	3	2.13	50.3333	35.4	4.95			0
E.citrodora vs maize	2	3	2.12	33.3333	34.6	1.425	3.61	2.83	209.566
E.camandulensis vs maize	2	3	2.35	51.3333	31	2.695	3.29	2.46	158.35
E.grands vs maize	2	3	2.3	46	35.3	1.35	4.32	3.08	248.227
E.saligna vs maize	2	3	1.95	27.3333	34.9	1.205	4.91	3.73	364.054
Sole maize	3	3	1.85	36.6667	30.7	5.135			0
E.citrodora vs maize	3	3	2.24	44.3333	29.3	1.48	3.38	2.51	164.853
E.camandulensis vs maize	3	3	2.22	48.6667	35	2.12	2.8	2.1	115.395
E.grands vs maize	3	3	1.94	33	33.8	0.755	5.23	3.99	416.576
E.saligna vs maize	3	3	2.15	45	37.8	0.735	4.5	3.5	320.542
